# Supplementary material
Source: PubMed Central journal article supplement (PMC1283276)
Supplement: bmj_38632.611123.AEv2_1.pdf [file bmj_38632.611123.AEv2_1.pdf]

Posted as supplied by the author

Quality scores in 1998 and 2003 (items in italics represent conditional indicators, i.e. ones which did not necessarily apply to all patients)

**Coronary heart disease (1998 sample =737 patients, 2003 sample =487 patients)**

| Indicator; recording of...                                                                                                                      | Score in 1998 (%) | Score in 2003 (%) | Change in scores 1998 to 2003 (95% CI) | Significance of change in scores (p-value) | Improvement in scores as a percentage of maximum possible improvement | Number of patients (1998) | Number of patients (2003) |
|-------------------------------------------------------------------------------------------------------------------------------------------------|-------------------|-------------------|----------------------------------------|--------------------------------------------|-----------------------------------------------------------------------|---------------------------|---------------------------|
| Frequency or pattern of angina attacks (last 15 months) **                                                                                      | 43.3              | 60.8              | 17.5<br>(9.4 – 25.6)                   | <0.001                                     | 30.9                                                                  | 726                       | 487                       |
| Blood pressure (last 15 months) **                                                                                                              | 87.0              | 91.0              | 4.0<br>(-5.1 – 8.5)                    | 0.082                                      | 30.8                                                                  | 736                       | 487                       |
| Exercise capacity (last 15 months) **                                                                                                           | 36.8              | 66.9              | 30.2<br>(21.2 – 39.1)                  | <0.001                                     | 47.7                                                                  | 734                       | 487                       |
| Prescribed or advised to take aspirin unless record of contraindication or intolerance                                                          | 76.1              | 75.2              | -1.0<br>(-5.6 – 3.6)                   | 0.687                                      | -4.1                                                                  | 733                       | 487                       |
| <i>Prescribed beta-blocker as maintenance therapy if sole therapy</i>                                                                           | 52.02             | 59.1              | 7.1<br>(-4.3 – 18.5)                   | 0.224                                      | 14.8                                                                  | 173                       | 154                       |
| <i>Action taken on blood pressure if systolic blood pressure &gt; 160, or &gt; 140 if cholesterol level &gt; 5.5 mmol/l (last 15 months) **</i> | 37.0              | 57.7              | 20.7<br>(6.0-35.4)                     | 0.006                                      | 32.8                                                                  | 100                       | 52                        |
| Cholesterol (last 5 years)                                                                                                                      | 63.0              | 89.3              | 26.3<br>(19.7 – 32.9)                  | <0.001                                     | 71.1                                                                  | 735                       | 487                       |
| Dietary advice (last 5 years)                                                                                                                   | 59.4              | 76.6              | 17.2<br>(7.3 – 27.1)                   | 0.001                                      | 42.4                                                                  | 721                       | 487                       |
| Smoking status (last 5 years)                                                                                                                   | 85.6              | 87.1              | 1.5                                    | 0.662                                      | 10.1                                                                  | 736                       | 487                       |

|                                                                                                  |      |      |               |      |        |      |     |     |  |  |  |  |  |
|--------------------------------------------------------------------------------------------------|------|------|---------------|------|--------|------|-----|-----|--|--|--|--|--|
|                                                                                                  |      |      |               |      |        |      |     |     |  |  |  |  |  |
| <i>Smoking advice to smokers</i><br>(last 5 years)                                               | 61.8 | 77.3 | (-5.1 – 8.0)  |      |        |      |     |     |  |  |  |  |  |
| <i>Weight advice if overweight</i><br>(last 5 years)                                             | 61.9 | 78.4 | (5.3 – 27.6)  | 16.5 | 0.042  | 40.6 | 157 | 75  |  |  |  |  |  |
| <i>Action if cholesterol &gt;5.5 mmol/l (age &lt;70) (most recent recording in last 5 years)</i> | 56.7 | 71.7 | (0.1 – 30.0)  | 15.0 | 0.048  | 34.6 | 120 | 46  |  |  |  |  |  |
| Ever referred to specialist or for exercise ECG                                                  | 75.3 | 87.9 | (7.4 – 17.8)  | 12.6 | <0.001 | 51.1 | 736 | 487 |  |  |  |  |  |
| BP level <150/90 (average of last 3 recordings over last 15 months)                              | 47.3 | 72.2 | (18.9 – 31.0) | 24.9 | <0.001 | 47.3 | 734 | 464 |  |  |  |  |  |
| Cholesterol level (NSF <5) (most recent recording in last 5 years)                               | 17.6 | 61.4 | (37.0 – 50.7) | 43.8 | <0.001 | 53.2 | 735 | 435 |  |  |  |  |  |

**Asthma (1998 sample = 786 patients; 2003 sample = 504 patients)**

| <b>Indicator; recording of...</b>                                              | Score in 1998 (%) | Score in 2003 (%) | Change 1998 to 2003 (95% CI) | Significance of change in scores | Improvement in scores as a percentage of maximum possible improvement | Number of patients (1998) | Number of patients (2003) |
|--------------------------------------------------------------------------------|-------------------|-------------------|------------------------------|----------------------------------|-----------------------------------------------------------------------|---------------------------|---------------------------|
| Record of daily, nocturnal or activity limiting symptoms (last 15 months) **   | 43.6              | 57.7              | 14.2 (5.0-23.3)              | 0.002                            | 25.1                                                                  | 780                       | 504                       |
| Normal/ predicted peak flow or record of difficulty using meter (last 5 years) | 77.3              | 85.7              | 8.4 (2.7 – 14.2)             | 0.004                            | 37.1                                                                  | 783                       | 504                       |
| Smoking status (last 5 years)                                                  | 82.3              | 84.3              | 2.1 (-4.7 – 8.9)             | 0.550                            | 11.7                                                                  | 783                       | 504                       |
| Inhaler technique (last 5 years)                                               | 53.6              | 58.7              | 5.1 (-4.4 – 14.7)            | 0.292                            | 11.1                                                                  | 763                       | 504                       |
| <i>Smoking advice to smokers</i>                                               | 59.8              | 86.9              | 27.1                         | <0.001                           | 67.4                                                                  | 174                       | 122                       |

|                                                                                                                                                                       |       |      |                        |        |              |     |     |  |  |  |  |  |
|-----------------------------------------------------------------------------------------------------------------------------------------------------------------------|-------|------|------------------------|--------|--------------|-----|-----|--|--|--|--|--|
| (last 5 years)                                                                                                                                                        |       |      |                        |        | 16.5 – 37.7) |     |     |  |  |  |  |  |
| <i>Self-management plan for those on high dose steroids or who have had in-patient treatment for asthma (last 5 years)</i>                                            | 34.4  | 50.8 | 16.4<br>(-1.5 – 34.2)  | 0.072  | 24.9         | 151 | 63  |  |  |  |  |  |
| <i>For patients with recorded exercise induced bronchospasm, short-acting bronchodilators prescribed for use before exercise (last 5 years)</i>                       | 35.5  | 84.9 | 49.4<br>(30.3 – 68.5)  | <0.001 | 76.5         | 141 | 66  |  |  |  |  |  |
| <i>Speech rate/pulse/respiratory rate during consultation for exacerbation of asthma if immediate bronchodilator therapy was used (most recent in last 5 years) *</i> | 100.0 | 45.7 | -54.3                  |        |              | 10  | 35  |  |  |  |  |  |
| <i>Peak flow during a consultation for an exacerbation (most recent in last 5 years)</i>                                                                              | 71.7  | 69.7 | -2.0<br>(-15.3 – 11.3) | 0.769  | -7.0         | 254 | 89  |  |  |  |  |  |
| <i>Oral steroids prescribed if peak flow &lt;60% of normal (most recent in last 5 years) *</i>                                                                        | 88.5  | 90.9 | 2.5                    |        |              | 52  | 11  |  |  |  |  |  |
| <i>Action taken if patient experiencing nocturnal symptoms (most recent in last 5 years)</i>                                                                          | 63.0  | 71.6 | 8.6<br>(-5.9 – 23.0)   | 0.246  | 23.1         | 200 | 116 |  |  |  |  |  |
| <i>Action taken if patient experiencing activity limiting symptoms (most recent in last 5 years)</i>                                                                  | 52.6  | 70.8 | 18.1<br>(-2.7 – 39.0)  | 0.088  | 38.3         | 114 | 65  |  |  |  |  |  |
| <i>Referral to a respiratory physician where oral steroids</i>                                                                                                        | 47.8  | 57.1 | 9.3                    |        |              | 23  | 7   |  |  |  |  |  |

|                                                           |  |  |  |  |  |  |  |  |  |  |
|-----------------------------------------------------------|--|--|--|--|--|--|--|--|--|--|
| <i>are used in maintenance treatment (last 5 years) *</i> |  |  |  |  |  |  |  |  |  |  |
|-----------------------------------------------------------|--|--|--|--|--|--|--|--|--|--|

**Type 2 diabetes (1998 sample = 777 patients; 2003 sample = 504 patients)**

| Indicator; recording of...                                            | Score in 1998 (%) | Score in 2003 (%) | Change 1998 to 2003 (95% CI) | Significance of change in scores | Improvement in scores as a percentage of maximum possible improvement | Number of patients (1998) | Number of patients (2003) |
|-----------------------------------------------------------------------|-------------------|-------------------|------------------------------|----------------------------------|-----------------------------------------------------------------------|---------------------------|---------------------------|
| <b>HbA1c (last 15 months) **</b>                                      | 87.6              | 92.7              | 5.1<br>(1.0 – 9.1)           | 0.014                            | 40.8                                                                  | 775                       | 504                       |
| Visual examination of the feet (last 15 months) **                    | 61.5              | 69.6              | 8.1<br>(-0.06 – 16.8)        | 0.066                            | 21.1                                                                  | 774                       | 504                       |
| Peripheral pulses or record of vibration sense (last 15 months) **    | 58.8              | 62.7              | 3.9<br>(-7.0 – 14.8)         | 0.482                            | 9.5                                                                   | 774                       | 504                       |
| Serum creatinine (last 15 months) **                                  | 79.8              | 89.5              | 9.7<br>(4.5 – 14.9)          | <0.001                           | 48.0                                                                  | 776                       | 504                       |
| Urine proteinuria (last 15 months) **                                 | 67.7              | 74.6              | 6.9<br>(-0.4 – 14.2)         | 0.064                            | 21.4                                                                  | 771                       | 504                       |
| Examination of fundi or visual acuity (last 15 months) **             | 70.8              | 71.8              | 1.1<br>(-5.6 – 7.7)          | 0.754                            | 3.7                                                                   | 773                       | 504                       |
| Weight (last 15 months) **                                            | 80.5              | 86.5              | 6.0<br>(0.3 – 11.7)          | 0.039                            | 30.7                                                                  | 775                       | 504                       |
| Blood pressure (last 15 months) **                                    | 92.8              | 94.6              | 1.9<br>(-1.6 – 5.3)          | 0.285                            | 25.8                                                                  | 776                       | 504                       |
| <i>Hypoglycaemia symptoms if on sulphonylurea (last 15 months) **</i> | 18.4              | 8.0               | -10.4<br>(-16.9 – -3.8)      | 0.002                            | -12.7                                                                 | 571                       | 311                       |
| Smoking status (last 5 years)                                         | 87.0              | 88.5              | 1.5<br>(-4.2 – 7.2)          | 0.615                            | 11.3                                                                  | 771                       | 504                       |
| Serum cholesterol (last 5 years)                                      | 74.9              | 97.6              | 22.8<br>(16.5 – 29.0)        | <0.001                           | 90.5                                                                  | 776                       | 504                       |
| <i>Documentation of education if</i>                                  | 82.3              | 86.4              | 4.1                          | 0.467                            | 23.2                                                                  | 254                       | 249                       |

| Indicator; recording of...                                                                                                                     | Score in 1998 (%) | Score in 2003 (%) | Change 1998 to 2003 (95% CI) | Significance of change in scores | Improvement in scores as a percentage of maximum possible improvement | Number of patients (1998) | Number of patients (2003) |
|------------------------------------------------------------------------------------------------------------------------------------------------|-------------------|-------------------|------------------------------|----------------------------------|-----------------------------------------------------------------------|---------------------------|---------------------------|
| <b>Indicator; recording of...</b><br>diagnosed <5 years (last 5 years)                                                                         |                   |                   | (-6.9 – 15.0)                |                                  |                                                                       |                           |                           |
| Advice given to smokers (last 5 years)                                                                                                         | 66.9              | 77.2              | 10.3<br>(-6.4 – 27.0)        | 0.226                            | 31.1                                                                  | 133                       | 79                        |
| Under 80 years: Offered treatment if average of last 3 readings shows diastolic >100 or systolic >150 and diastolic >90 (last 15 months) *     | 63.6              | 81.8              | 18.2                         |                                  |                                                                       | 66                        | 33                        |
| Referral to a specialist where creatinine is >200 mmol/l (last 15 months) *                                                                    | 76.9              | 100.0             | 23.1                         |                                  |                                                                       | 13                        | 3                         |
| If patient is being treated for hypertension and has proteinuria (macro- but not micro-albuminuria), the patient is on an ACE inhibitor*       | 53.1              | 57.1              | 4.0                          |                                  |                                                                       | 367                       | 7                         |
| If patient was started on ACE inhibitor, creatinine and potassium were measured within 1 month of starting treatment (anytime in last 5 years) | 37.4              | 32.1              | -5.3<br>(-18.4 – 7.8)        | 0.427                            | -8.5                                                                  | 198                       | 184                       |
| For patients under 70, where the last HbA1c was >9, patient offered a therapeutic intervention to improve glycaemic control (last 15 months)   | 73.0              | 71.6              | -1.4<br>(-13.7 – 10.9)       | 0.823                            | -5.2                                                                  | 100                       | 81                        |

| Indicator; recording of...                                                                                                                                                                     | Score in 1998 (%) | Score in 2003 (%) | Change 1998 to 2003 (95% CI) | Significance of change in scores | Improvement in scores as a percentage of maximum possible improvement | Number of patients (1998) | Number of patients (2003) |
|------------------------------------------------------------------------------------------------------------------------------------------------------------------------------------------------|-------------------|-------------------|------------------------------|----------------------------------|-----------------------------------------------------------------------|---------------------------|---------------------------|
| <b>Indicator; recording of...</b><br><i>For patients over 70, where the last HbA1c was &gt; 10, patient offered a therapeutic intervention to improve glycaemic control (last 15 months) *</i> | 77.3              | 60.0              |                              |                                  |                                                                       | 22                        | 5                         |
| BP level < 140/85 (average of last 3 recordings over last 15 months)                                                                                                                           | 21.8              | 35.8              | 14.0<br>(8.3 – 19.8)         | <0.001                           | 17.9                                                                  | 776                       | 483                       |
| Cholesterol level <5 (last 15 months)                                                                                                                                                          | 21.5              | 52.0              | 30.5<br>(25.4 – 35.7)        | <0.001                           | 38.9                                                                  | 777                       | 492                       |
| HbA1c level <7.4 (last 15 months)                                                                                                                                                              | 37.9              | 39.7              | 1.8<br>(-5.1 – 8.6)          | 0.622                            | 2.9                                                                   | 775                       | 469                       |

\* Statistical tests were not carried out on variables if there was a mean of less than one case per practice where the indicator was triggered.

\*\* Data adjusted for the fact that 'in the past year' was interpreted as a record of the clinical feature in the previous 14 months in 1998 (in line with the review criteria proposed by expert panels<sup>18</sup>), and a record in the previous 15 months in 2003 in line with the 2004 GMS contract.
